# Supplementary material
Source: ML conference proceedings conference paper supplement (https://openreview.net/forum?id=sRqLlb50Ro3)
Supplement: supplementary_material [file attachment]

---

# Implicitly Regularized RL with Implicit Q-Values

---

Anonymous Author(s)

Affiliation

Address

email

## Abstract

The  $Q$ -function is a central quantity in many Reinforcement Learning (RL) algorithms for which RL agents behave following a (soft)-greedy policy w.r.t. to  $Q$ . It is a powerful tool that allows action selection without a model of the environment and even without explicitly modeling the policy. Yet, this scheme can only be used in discrete action tasks, with small numbers of actions, as the softmax cannot be computed exactly otherwise. Especially the usage of function approximation, to deal with continuous action spaces in modern actor-critic architectures, intrinsically prevents the exact computation of a softmax. We propose to alleviate this issue by parametrizing the  $Q$ -function *implicitly*, as the sum of a log-policy and of a value function. We use the resulting parametrization to derive a practical off-policy deep RL algorithm, suitable for large action spaces, and that enforces the softmax relation between the policy and the  $Q$ -value. We provide a theoretical analysis of our algorithm: from an Approximate Dynamic Programming perspective, we show its equivalence to a regularized version of value iteration, accounting for both entropy and Kullback-Leibler regularization, and that enjoys beneficial error propagation results. We then evaluate our algorithm on classic control tasks, where its results compete with state-of-the-art methods.

## 1 Introduction

A large body of reinforcement learning (RL) algorithms, based on approximate dynamic programming (ADP) [Bertsekas and Tsitsiklis, 1996, Scherrer et al., 2015], operate in two steps: A greedy step, where the algorithm learns a policy that maximizes a  $Q$ -function, and an evaluation step, that (partially) updates the  $Q$ -values towards the  $Q$ -values of the policy. A common improvement to these techniques is to use regularization, that prevents the new updated policy from being too different from the previous one, or from a fixed “prior” policy. For example, Kullback-Leibler (KL) regularization keeps the policy close to the previous iterate [Vieillard et al., 2020a], while entropy regularization keeps the policy close to the uniform one [Haarnoja et al., 2018a]. Entropy regularization, often used in this context [Ziebart, 2010], modifies both the greedy step and the evaluation step so that the policy jointly maximizes its expected return and its entropy. In this framework, the solution to the policy optimization step is simply a softmax of the  $Q$ -values over the actions. In small discrete action spaces, the softmax can be computed exactly: one only needs to define a *critic* algorithm, with a single loss that optimizes a  $Q$ -function. However, in large multi-dimensional – or even continuous – action spaces, one needs to estimate it. This estimation is usually done by adding an *actor* loss, that optimizes a policy to fit this softmax. It results in an *actor-critic* algorithm, with two losses that are optimized simultaneously [Haarnoja et al., 2018a]. This additional optimization step introduces supplementary errors to the ones already created by the approximation in the evaluation step.

To remove these extraneous approximations, we introduce the Implicit  $Q$ -Functions (IQ) algorithm, that deviates from classic actor-critics, as it optimizes a policy and a value in a single loss. The core idea is to implicitly represent the  $Q$ -function as the sum of a value function and a log-policy.

This representation ensures that the policy is an *exact* softmax of the  $Q$ -value, *despite the use of any approximation scheme*. We use this to design a practical model-free deep RL algorithm that optimizes with a single loss a policy network and a value network, built on this implicit representation of a  $Q$ -value. To better understand it, we abstract this algorithm to an ADP scheme, IQ-DP, and use this point of view to provide a detailed theoretical analysis. It relies on a key observation, that shows an equivalence between IQ-DP and a specific form of regularized Value Iteration (VI). This equivalence explains the role of the components of IQ: namely, IQ performs entropy and KL regularization. It also allows us to derive strong performance bounds for IQ-DP. In particular, we show that the errors made when following IQ-DP are compensated along iterations.

Parametrizing the  $Q$ -value as a sum of a log-policy and a value is reminiscent of the dueling architecture [Wang et al., 2016], that factorizes the  $Q$ -value as the sum of an advantage and a value. In fact, we show that it is a limiting case of IQ in a discrete actions setting. This link highlights the role of the policy in IQ, which calls for a discussion on the necessary parametrization of the policy.

Finally, we empirically validate IQ. We evaluate our method on several classic continuous control benchmarks: locomotion tasks from Openai Gym [Brockman et al., 2016], and hand manipulation tasks from the Adroit environment [Rajeswaran et al., 2017]. On these environments, IQ reaches performances competitive with state-of-the-art actor critic methods.

## 2 Implicit $Q$ -value parametrization

We consider the standard Reinforcement Learning (RL) setting, formalized as a Markov Decision Process (MDP). An MDP is a tuple  $\{\mathcal{S}, \mathcal{A}, P, r, \gamma\}$ .  $\mathcal{S}$  and  $\mathcal{A}$  are the finite state and action spaces<sup>1</sup>,  $\gamma \in [0, 1]$  is the discount factor and  $r : \mathcal{S} \times \mathcal{A} \rightarrow [-R_{max}, R_{max}]$  is the bounded reward function. Write  $\Delta_X$  the simplex over the finite set  $X$ . The dynamics of an MDP are defined by a Markovian transition kernel  $P \in \Delta_{\mathcal{S} \times \mathcal{A}}$ , where  $P(s'|s, a)$  is the probability of transitioning to state  $s'$  after taking action  $a$  in  $s$ . An RL agent acts through a stochastic policy  $\pi \in \Delta_{\mathcal{A}}$ , a mapping from states to distribution over actions. The quality of a policy is quantified by the value function,  $V_\pi(s) = \mathbb{E}_\pi[\sum_{t=0}^{\infty} \gamma^t r(s_t, a_t) | s_0 = s]$ . The  $Q$ -function is a useful extension, which notably allows choosing a (soft)-greedy action in a model-free setting,  $Q_\pi(s, a) = r(s, a) + \mathbb{E}_{s'|s, a}[V_\pi(s')]$ . An optimal policy is one that achieve the highest expected return,  $\pi_* = \operatorname{argmax}_\pi V_\pi$ .

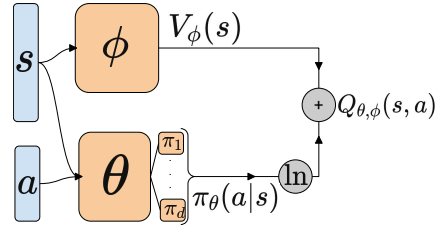

Figure 1: view of the IQ parametrization.

A classic way to design practical algorithms beyond the tabular setting is to adopt the Actor-Critic perspective. In this framework, an RL agent parametrizes a policy  $\pi_\theta$  and a  $Q$ -value  $Q_\psi$  with function approximation, usually through the use of neural networks, and aims at estimating an optimal policy. The policy and the  $Q$ -function are then updated by minimizing two losses: the actor loss corresponds to the greedy step, and the critic loss to the evaluation step. The weights of the policy and  $Q$ -value networks are regularly frozen into *target* weights  $\bar{\psi}$  and  $\bar{\theta}$ . With entropy regularization, the greedy step amounts to finding the policy that maximizes  $\mathbb{E}_{s \sim \mathcal{S}, a \sim \pi_\theta} [Q_{\bar{\psi}}(s, a) + \tau \ln \pi_\theta(a|s)]$  (maximize the  $Q$ -value with stochastic enough policy). The solution to this problem is simply  $\pi_\theta(\cdot|s) = \operatorname{softmax}(Q_{\bar{\psi}}(s, \cdot)/\tau)$ , which is the result of the greedy step of regularized Value Iteration (VI) [Geist et al., 2019] and, for example, how the optimization step of Soft Actor-Critic [Haarnoja et al., 2018a, SAC] is built. In a setting where the action space is discrete and small, it amounts to a simple softmax computation. However, on more complex action spaces (continuous, and/or with a higher number of dimensions: as a reference, the Humanoid-v2 environment from Openai Gym [Brockman et al., 2016] has an action space of dimension 17), it becomes prohibitive to use the exact solution. In this case, the common practice is to resort to an approximation with a parametric distribution model. In many actor critic algorithms (SAC, TD3[Fujimoto et al., 2018], ...), the policy is modelled as a Gaussian distribution over actions. It introduces approximation errors, resulting from the partial optimization process of the critic, and inductive bias, as a Gaussian policy cannot represent an arbitrary softmax distribution. We now turn to the description of our core contribution: the Implicit  $Q$ -value (IQ) algorithm, introduced to mitigate this discrepancy.

<sup>1</sup>We restrict to finite spaces for the sake of analysis, but our approach applies to continuous spaces.

IQ implicitly parametrizes a  $Q$ -value via an explicit parametrization of a policy and a value, as visualized in Fig. 1. Precisely, from a policy network  $\pi_\theta$  and a value network  $V_\phi$ , we define our implicit  $Q$ -value as

$$Q_{\theta,\phi}(s, a) = \tau \ln \pi_\theta(a|s) + V_\phi(s). \quad (1)$$

Since  $\pi_\theta$  is constrained to be a distribution over the actions, we have by construction that  $\pi_\theta(a|s) = \text{softmax}(Q_{\theta,\phi}/\tau)$ , the solution of the regularized greedy step (see Appx. A.1 for a detailed proof). Hence, the consequence of using such a parametrization is that the greedy step is performed exactly, even in the function approximation regime. Compared to the classic actor-critic setting, it thus gets rid of the errors created by the actor. Note that calling  $V_\phi$  a value makes sense, since following the same reasoning we have that  $V_\phi(s) = \tau \ln \sum_{a'} \exp(Q_{\theta,\phi}(s, a')/\tau)$ , a soft version of the value. With this parametrization in mind, one could derive a deep RL algorithm from any value-based loss using entropy regularization. We conserve the fixed-point approach of the standard actor-critic framework,  $\theta$  and  $\phi$  are regularly copied to  $\bar{\theta}$  and  $\bar{\phi}$ , and we design an off-policy algorithm, working on a replay buffer of transitions  $(s_t, a_t, r_t, s_{t+1})$  collected during training. Consider two hyperparameters,  $\tau \in (0, \infty)$  and  $\alpha \in (0, 1)$  that we will show in Sec. 3 control two forms of regularization.

The policy and value are optimized jointly by minimizing the loss

$$\mathcal{L}_{\text{IQ}}(\theta, \phi) = \hat{\mathbb{E}} \left[ (r_t + \alpha \tau \ln \pi_{\bar{\theta}}(a_t|s_t) + \gamma V_{\bar{\phi}}(s_{t+1}) - \tau \ln \pi_\theta(a_t|s_t) - V_\phi(s_t))^2 \right], \quad (2)$$

where  $\hat{\mathbb{E}}$  denote the empirical expected value over a dataset of transitions. IQ consists then in a single loss that optimizes jointly a policy and a value. This brings a notable remark on the role of  $Q$ -functions in RL. Indeed,  $Q$ -learning was introduced by Watkins and Dayan [1992] – among other reasons – to make greediness possible without a model (using a value only, one needs to maximize it over all possible successive states, which requires knowing the transition model), and consequently derive practical, model-free RL algorithms. Here however, IQ illustrates how, with the help of regularization, one can derive a model-free algorithm that does not rely on an explicit  $Q$ -value.

### 3 Analysis

In this section, we explain the workings of the IQ algorithm defined by Eq. (2) and detail the influence of its hyperparameters. We abstract IQ into an ADP framework, and show that, from that perspective, it is equivalent to a Mirror Descent VI (MD-VI) scheme [Geist et al., 2019], with both entropy and KL regularization. Let us first introduce some useful notations. We make use of the actions partial dot-product notation: for  $u, v \in \mathbb{R}^{S \times \mathcal{A}}$ , we define  $\langle u, v \rangle = \left( \sum_{a \in \mathcal{A}} u(s, a) v(s, a) \right)_s \in \mathbb{R}^S$ . For any  $V \in \mathbb{R}^S$ , we have for any  $(s, a) \in \mathcal{S} \times \mathcal{A}$   $PV(s, a) = \sum_{s'} P(s'|s, a) V(s')$ . We will define regularized algorithms, using the entropy of a policy,  $H(\pi) = -\langle \pi, \ln \pi \rangle$ , and the KL divergence between two policies,  $\text{KL}(\pi||\mu) = \langle \pi, \ln \pi - \ln \mu \rangle$ . The  $Q$ -value of a policy is the unique fixed point of its Bellman operator  $T_\pi$  defined for any  $Q \in \mathbb{R}^{S \times \mathcal{A}}$  as  $T_\pi Q = r + \gamma P \langle \pi, Q \rangle$ . We denote  $Q_* = Q_{\pi_*}$  the optimal  $Q$ -value (the  $Q$ -value of the optimal policy). When the MDP is entropy-regularized with a temperature  $\tau$ , a policy  $\pi$  admits a *regularized*  $Q$ -value  $Q_\pi^\tau$ , the fixed point of the regularized bellman operator  $T_\pi^\tau Q = r + \gamma P \langle \pi, Q - \tau \ln \pi \rangle$ . A regularized MDP admits an optimal *regularized* policy  $\pi_*^\tau$  and a unique optimal *regularized*  $Q$ -value  $Q_*^\tau$  [Geist et al., 2019].

#### 3.1 Ideal case

First, let us look at the ideal case, *i.e.* when  $\mathcal{L}_{\text{IQ}}$  is exactly minimized at each iteration (tabular representation, dataset covering the whole state-action space, expectation rather than sampling for transitions). In this context, IQ can be understood as a Dynamic Programming (DP) scheme that iterates on a policy  $\pi_{k+1}$  and a value  $V_k$ . They are respectively equivalent to the target networks  $\pi_{\bar{\theta}}$  and  $V_{\bar{\phi}}$ , while the next iterate  $(\pi_{k+2}, V_{k+1})$  matches the solution  $(\pi_\theta, V_\phi)$  of the optimization problem in Eq. (2). We call the scheme IQ-DP( $\alpha, \tau$ ) and one iteration is defined by choosing  $(\pi_{k+2}, V_{k+1})$  such that the squared term in Eq. (2) is 0, that is

$$\tau \ln \pi_{k+2} + V_{k+1} = r + \alpha \tau \ln \pi_{k+1} + \gamma P V_k. \quad (3)$$

This equation is well-defined, due to the underlying constraint that  $\pi_{k+2} \in \Delta_{\mathcal{A}}^S$  (the policy must be a distribution over actions), that is  $\sum_{a \in \mathcal{A}} \pi(a|s) = 1$  for all  $s \in \mathcal{S}$ . The basis for our discussion will be the equivalence of this scheme to a version of regularized VI. Indeed, we have the following result, proved in Appendix A.3.

140 **Theorem 1.** For any  $k \geq 1$ , let  $(\pi_{k+2}, V_{k+1})$  be the solution of  $\text{IQ-DP}(\alpha, \tau)$  at step  $k$ . We have that

$$\begin{cases} \pi_{k+2} = \operatorname{argmax} \langle \pi, r + \gamma P V_k \rangle + (1 - \alpha) \tau \mathcal{H}(\pi) - \alpha \tau \text{KL}(\pi || \pi_{k+1}) \\ V_{k+1} = \langle \pi_{k+2}, r + \gamma P V_k \rangle + (1 - \alpha) \tau \mathcal{H}(\pi_{k+2}) - \alpha \tau \text{KL}(\pi_{k+2} || \pi_{k+1}) \end{cases}$$

141 so  $\text{IQ-DP}(\alpha, \tau)$  produces the same sequence of policies as a value-based version of Mirror Descent  
142 VI, MD-VI( $\alpha\tau, (1 - \alpha)\tau$ ) [Vieillard et al., 2020a].

143 **Discussion.** The previous results sheds a first light on the nature of the IQ method. Essentially,  
144 IQ-DP is a parametrization of a VI scheme regularized with both entropy and KL divergence, MD-  
145 VI( $\alpha\tau, (1 - \alpha)\tau$ ). This first highlights the role of the hyperparameters, as it shows the interaction  
146 between the two forms of regularization. The value of  $\alpha$  balances between those two: with  $\alpha = 0$ ,  
147 IQ-DP reduces to a classic VI regularized with entropy; with  $\alpha = 1$  only the KL regularization  
148 will be taken into account. The value of  $\tau$  then controls the amplitude of this regularization. In  
149 particular, in the limit  $\alpha = 0, \tau \rightarrow 0$ , we recover the standard VI algorithm. This results also  
150 justifies the soundness of IQ-DP. Indeed, this MD-VI scheme is known to converge to  $\pi_*^{(1-\alpha)\tau}$  the  
151 optimal policy of the regularized MDP [Vieillard et al., 2020a, Thm. 2] and this results readily  
152 applies to IQ<sup>2</sup>. Another consequence is that it links IQ to Advantage Learning (AL) [Bellemare et al.,  
153 2016]. Indeed, AL is a limiting case of MD-VI when  $\alpha > 0$  and  $\tau \rightarrow 0$  [Vieillard et al., 2020b].  
154 Therefore, IQ also generalizes AL, and the  $\alpha$  parameter can be interpreted as the advantage coefficient.  
155 Finally, a key observation is that IQ performs KL regularization implicitly, the way it was introduced  
156 by Munchausen RL [Vieillard et al., 2020b], by augmenting the reward with the  $\alpha\tau \ln \pi_{k+1}$  term  
157 (Eq. (3)). This observation will have implications discussed next.

### 158 3.2 Error propagation result

159 Now, we are interested in understanding how errors introduced by the function approximation used  
160 propagate along iterations. At iteration  $k$  of IQ, denote  $\pi_{k+1}$  and  $V_k$  the target networks. In the  
161 approximate setting, we do not solve Eq. (3), but instead, we minimize  $\mathcal{L}(\theta, \phi)$  with stochastic  
162 gradient descent. This means that  $\pi_{k+2}$  and  $V_{k+1}$  are the result of this optimization, and thus the next  
163 target networks. The optimization process introduces errors, that come from many sources: partial  
164 optimization, function approximation (policy and value are approximated with neural networks),  
165 finite data, etc. We study the impact of these errors on the distance between the optimal  $Q$ -value  
166 of the MDP and the regularized  $Q$ -value of the current policy used by IQ,  $Q_{\pi_{k+1}}^{(1-\alpha)\tau}$ . We insist right  
167 away that  $Q_{\pi_{k+1}}^{(1-\alpha)\tau}$  is not the learned, implicit  $Q$ -value, but the actual  $Q$ -value of the policy computed  
168 by IQ in the regularized MDP. We have the following result concerning the error propagation.

169 **Theorem 2.** Write  $\pi_{k+1}$  and  $V_k$  the  $k^{\text{th}}$  update of respectively the target policy and value networks.  
170 Consider the error at step  $k$ ,  $\epsilon_k \in \mathbb{R}^{S \times A}$ , as the difference between the ideal and the actual updates  
171 of IQ. Formally, we define the error as, for all  $k \geq 1$ ,

$$\epsilon_k = \tau \ln \pi_{k+2} + V_{k+1} - (r + \alpha\tau \ln \pi_{k+1} + \gamma P V_k),$$

172 and the moving average of the errors as

$$E_k = (1 - \alpha) \sum_{j=1}^k \alpha^{k-j} \epsilon_j.$$

173 We have the following results for two different cases depending on the value of  $\alpha$ . Note that when  
174  $\alpha < 1$ , we bound the distance to regularized optimal  $Q$ -value.

175 1. General case:  $0 < \alpha < 1$  and  $\tau > 0$ , entropy and KL regularization together:

$$\|Q_*^{(1-\alpha)\tau} - Q_{\pi_k}^{(1-\alpha)\tau}\|_\infty \leq \frac{2}{(1-\gamma)^2} \left( (1-\gamma) \sum_{j=1}^k \gamma^{k-j} \|E_j\|_\infty \right) + o\left(\frac{1}{k}\right).$$

176 2. Specific case  $\alpha = 1, \tau > 0$ , use of KL regularization alone:

$$\|Q_* - Q_{\pi_k}\|_\infty \leq \frac{2}{1-\gamma} \left\| \frac{1}{k} \sum_{j=1}^k \epsilon_j \right\|_\infty + O\left(\frac{1}{k}\right).$$

---

<sup>2</sup>Vieillard et al. [2020a] show this for  $Q$ -functions, but it can straightforwardly be extended to value functions.

177 *Sketch of proof.* The full proof is provided in Appendix A.4. We build upon the connection we  
 178 established between IQ-DP and a VI scheme regularized by both KL and entropy in Thm. 1. By  
 179 injecting the proposed representation into the classic MD-VI scheme, we can build upon the analysis  
 180 of Vieillard et al. [2020a, Thm. 1 and 2] to provide these results.  $\square$

181 **Impact of KL regularization.** The KL regularization term, and specifically in the MD-VI frame-  
 182 work, is discussed extensively by Vieillard et al. [2020a], and we refer to them for in-depth analysis  
 183 of the subject. We recall here the main interests of KL regularization, as illustrated by the bounds of  
 184 Thm 2. In the second case, where it is the clearest (only KL is used), we observe a beneficial property  
 185 of KL regularization: Averaging of errors. Indeed, in a classic non-regularized VI scheme [Scherrer  
 186 et al., 2015], the error  $\|Q_* - Q_{\pi_\theta}\|$  would depend on a moving average of the norms of the errors  
 187  $(1 - \gamma) \sum_{j=1}^k \gamma^{k-j} \|\epsilon_k\|_\infty$ , while with the KL it depends on the norm of the average of the errors  
 188  $(1/k) \|\sum_{j=1}^k \epsilon_k\|$ . In a simplified case where the errors would be i.i.d. and zero mean, this would  
 189 allow convergence of approximate MD-VI, but not of approximate VI. In the case  $\alpha < 1$ , where we  
 190 introduce entropy regularization, the impact is less obvious, but we still transform a sum of norm of  
 191 errors into a sum of moving average of errors, which can help by reducing the underlying variance.

192 **Link to Munchausen RL.** As stated in the sketched proof, Thm. 2 is a consequence of [Vieillard  
 193 et al., 2020a, Thm. 1 and 2]. A crucial limitation of this work is that the analysis only applies  
 194 when no errors are made in the greedy step. This is possible in a relatively simple setting, with  
 195 tabular representation, or with a linear parametrization of the  $Q$ -function. However, in the general  
 196 case with function approximation, exactly solving the optimization problem regularized by KL  
 197 is not immediately possible: the solution of the greedy step of MD-VI( $\alpha\tau, (1 - \alpha)\tau$ ) is  $\pi_{k+2} \propto$   
 198  $\exp(Q_{k+1}/\tau) \pi_k^\alpha$  (where  $Q_{k+1} = r + \gamma PV_k$ ), so computing it exactly would require remembering  
 199 every  $\pi_j$  during the procedure, which is not feasible in practice. A workaround to this issue was  
 200 introduced by Vieillard et al. [2020b] as Munchausen RL: the idea is to augment the reward by the  
 201 log-policy, to implicitly define a KL regularization term, while reducing the greedy step to a softmax.  
 202 As mentioned before, in small discrete action spaces, this allows to compute the greedy step exactly,  
 203 but it is not the case in multidimensional or continuous action spaces, and thus Munchausen RL loses  
 204 its interest in such domains. With IQ, we utilize the Munchausen idea to implicitly define the KL  
 205 regularization; but with our parametrization, the exactness of the greedy step holds even for complex  
 206 action spaces: recall that the parametrization defined in Eq. (1) enforces that the policy is a softmax of  
 207 the (implicit)  $Q$ -value. Thus, IQ can be seen as an extension of Munchausen RL to multidimensional  
 208 and continuous action spaces.

### 209 3.3 Link to the dueling architecture

210 Dueling Networks (DN) were introduced as a variation of the seminal Deep Q-Networks (DQN, Mnih  
 211 et al. [2015]), and has been empirically proven to be efficient (for example by Hessel et al. [2018]). The  
 212 idea is to represent the  $Q$ -value as the sum of a value and an advantage. In this setting, we work with  
 213 a notion of advantage defined over  $Q$ -functions (as opposed to defining the advantage as a function of  
 214 a policy). For any  $Q \in \mathbb{R}^{S \times A}$ , its advantage  $A_Q$  is defined  $A_Q(s, a) = Q(s, a) - \max_{a' \in A} Q(s, a')$ .  
 215 The advantage encodes a sub-optimality constraint: it has negative values and its maximum over  
 216 actions (the action maximizing the  $Q$ -value) is 0. Wang et al. [2016] propose to learn a  $Q$ -value by  
 217 defining an advantage network  $F_\Theta$  and a value network  $V_\Phi$ , which in turn define a  $Q$ -value  $Q_{\Theta, \Phi}$  as

$$Q_{\Theta, \Phi}(s, a) = \underbrace{F_\Theta(s, a) - \max_{a' \in A} F_\Theta(s, a')}_{\text{advantage}} + V_\Phi(s).$$

218 Subtracting the maximum over the actions ensures that the advantage network indeed represents an  
 219 advantage. Note that dueling DQN was designed for discrete action settings, where computing the  
 220 maximum over actions is not an issue.

221 In IQ, we need a policy network that represents a distribution over the actions. There are several  
 222 practical ways to represent the policy, that are discussed in Sec 4. For the sake of simplicity, let us for  
 223 now assume that we are in a mono-dimensional discrete action space, and that we use a common  
 224 scaled softmax representation. Specifically, our policy is represented by a neural network (eg. fully  
 225 connected)  $F_\theta$ , that maps state-action pairs to logits  $F_\theta(s, a)$ . The policy is then defined as  $\pi_\theta(\cdot|s) =$   
 226  $\text{softmax}(F_\theta(s, \cdot)/\tau)$ . Directly from the definition of the softmax, we observe that  $\tau \ln \pi_\theta(a|s) =$

227  $F_\theta(s, a) - \tau \ln \sum_{a' \in \mathcal{A}} \exp(F_\theta(s, a')/\tau)$ . The second term is a classic scaled logsumexp over the  
 228 actions, a soft version of the maximum: when  $\tau \rightarrow 0$ , we have that  $\tau \ln \sum_{a'} \exp(F(s, a')/\tau) \rightarrow$   
 229  $\max_{a'} F(s, a')$ . Within the IQ parametrization, we have

$$Q_{\theta, \phi} = F_\theta(s, a) - \underbrace{\tau \ln \sum_{a' \in \mathcal{A}} \exp(F(s, a')/\tau)}_{\text{soft-advantage}} + V_\phi(s),$$

230 which makes a clear link between IQ and DN. In this case (scaled softmax representation), the  
 231 IQ parametrization generalizes the dueling architecture, retrieved when  $\tau \rightarrow 0$  (and with an ad-  
 232 ditional AL term whenever  $\alpha > 0$ , see Sec. 3). In practice, Wang et al. [2016] use a differ-  
 233 ent parametrization of the advantage, replacing the maximum by a mean, defining  $Q_{\Theta, \Phi}(s, a) =$   
 234  $A_\Theta(s, a) - |\mathcal{A}|^{-1} \sum_{a' \in \mathcal{A}} A_\Theta(s, a') + V_\Phi(s)$ . We could use a similar trick and replace the logsumexp  
 235 by a mean in our policy parametrization, but in our case this did not prove to be efficient in practice.

236 We showed how the log-policy represents a soft version of the advantage. While this makes its role in  
 237 the learning procedure clearer, it also raises questions about what sort of representation would be the  
 238 most suited for optimization.

## 239 4 Practical considerations

240 We now describe key practical issues encountered when choosing a policy representation. The main  
 241 one comes from the delegation of the representation power of the algorithm to the policy network.  
 242 In a standard actor-critic algorithm – take SAC for example, where the policy is parametrized as a  
 243 Gaussian distribution – the goal of the policy is mainly to track the maximizing action of the  $Q$ -value.  
 244 Thus, estimation errors can cause the policy to choose sub-optimal actions, but the inductive bias  
 245 caused by the Gaussian representation may not be a huge issue in practice, as long as the mean of the  
 246 Gaussian policy is not too far from the maximizing action. In other words, the representation capacity  
 247 of an algorithm such as SAC lies mainly in the representation capacity of its  $Q$ -network.

248 In IQ, we have a parametrization of the policy that enforces it to be a softmax of an implicit  $Q$ -  
 249 value. By doing this, we trade in estimation error – our greedy step is exact by construction – for  
 250 representation power. More precisely, as the  $Q$ -value is not parametrized explicitly, but through the  
 251 policy, the representation power of IQ is in its policy network, and a “simple” representation might  
 252 not be enough anymore. For example, if we parameterized the policy as a Gaussian, this would  
 253 amount to parametrize an advantage as a quadratic function of the action: this would drastically limit  
 254 what the IQ could represent.

255 **Multicategorical policies.** To address this issue, we turn to other, richer, distribution representa-  
 256 tions. In practice, we consider a multi-categorical discrete softmax distribution. Precisely, we are in  
 257 the context of a multi-dimensional action space  $\mathcal{A}$  of dimension  $d$ , each dimension being a bounded  
 258 interval. We discretize each dimension of the space uniformly in  $n$  values  $\delta_j$ , for  $0 \leq j \leq n - 1$ .  
 259 It effectively defines a discrete action space  $\mathcal{A}' = \times_{j=1}^d \mathcal{A}_j$ , with  $\mathcal{A}_j = \{\delta_0, \dots, \delta_{n-1}\}$ . A multidimensional  
 260 action is a vector  $a \in \mathcal{A}'$ , and we denote  $a^j$  the  $j^{\text{th}}$  component of the action  $a$ . Assuming  
 261 independence between actions conditioned on states, a policy  $\pi_\theta$  can be factorized as the product of  
 262  $d$  marginal mono-dimensional policies  $\pi_\theta(a|s) = \prod_{j=1}^d \pi_\theta^j(a^j|s)$ . We represent each policy as the  
 263 softmax of the output of a neural network  $F_\theta^j$ , and thus we get the full representation

$$\pi_\theta(a|s) = \prod_{j=1}^d \text{softmax} \left( F_\theta^j(\cdot|s) \right) (a^j).$$

264 The  $F_\theta^j$  functions can be represented as neural networks with a shared core, which only differ in the  
 265 last layer. This type of multicategorical policy can represent any distribution (with  $n$  high enough)  
 266 that does not encompass a dependency between the dimensions. The independence assumption  
 267 is quite strong, and does not hold in general. From an advantage point of view, it assumes that  
 268 the soft-advantage (*i.e.* the log-policy) can be linearly decomposed along the actions. While this  
 269 somehow limits the advantage representation, it is a much weaker constraint than parameterizing the  
 270 advantage as a quadratic function of the action (which would be the case with a Gaussian policy). In

practice, these types of multicategorical policies have been experimented [Akkaya et al., 2019, Tang and Agrawal, 2020], and have proven to be efficient on continuous control tasks.

Even richer policy classes can be explored. To account for dependency between dimensions, one could envision auto-regressive multicategorical representations, used for example to parametrize a  $Q$ -value by Metz et al. [2017]. Another approach is to use richer continuous distributions, such as normalizing flows [Rezende and Mohamed, 2015, Ward et al., 2019]. In this work, we restrict ourselves to the multicategorical setting, which is sufficient to get satisfying results (Sec. 6), and we leave the other options for future work.

## 5 Related work

**Similar parametrizations.** Other algorithms make use of a similar parametrization. First, Path Consistency Learning (PCL, [Nachum et al., 2017]) also parametrize the  $Q$ -value as a sum of a log-policy and a value. Trust-PCL [Nachum et al., 2018], builds on PCL by adding a trust region constraint on the policy update, similar to our KL regularization term. A key difference with IQ is that (Trust-)PCL is a residual algorithm, while IQ works around a fixed-point scheme. Shortly, Trust-PCL can be seen as a version of IQ without the target value network  $V_{\bar{\phi}}$ . These entropy-regularized residual approaches are derived from the softmax temporal consistency principle, which allows to consider extensions to a specific form of multi-step learning (strongly relying on the residual aspect), but they also come with drawbacks, such as introducing a bias in the optimization when the environment is stochastic [Geist et al., 2017]. Second, Quinoa [Degrave et al., 2018] uses a similar loss to Trust-PCL and IQ (without reference to the former Trust-PCL), but do not propose any analysis, and is evaluated only on a few tasks. Third, Normalized Advantage Function (NAF, Gu et al. [2016]) is designed with similar principles. In NAF, a  $Q$ -value is parametrized as a value and an advantage, the former being quadratic on the action. It matches the special case of IQ with a Gaussian policy, where we recover this quadratic parametrization.

**Regularization.** Entropy and KL regularization are used by many other RL algorithms. Notably, from a dynamic programming perspective, IQ-DP(0,  $\tau$ ) performs the same update as SAC – an entropy regularized VI. This equivalence is however not true in the function approximation regime. Due to the empirical success of SAC and its link to IQ, it will be used as our main baseline on continuous control tasks. Other algorithms also use KL regularization, notably Maximum a posteriori Policy Optimization (MPO, Abdolmaleki et al. [2018]). We refer to Vieillard et al. [2020a] for an exhaustive review of algorithms encompassed within the MD-VI framework.

## 6 Experiments

**Environments and metrics.** We evaluate IQ first on the Mujoco environment from OpenAI Gym [Brockman et al., 2016]. It consists of 5 locomotion tasks, with action spaces ranging from 3 (Hopper-v2) to 17 dimensions (Humanoid-v2). We use a rather long time horizon setting, evaluating our algorithm on 20M steps on each environments. We also provide result on the Adroit manipulation dataset [Rajeswaran et al., 2017], with a similar setting of 20M environment steps. Adroit is a collection of 4 hand manipulation tasks. This environment is often use in an offline RL setting, but here we use it only as a direct RL benchmark. Out of these 4 tasks, we only consider 3 of them: We could not find any working algorithm (baseline or new) on the “relocate” task. To summarize the performance of an algorithm, we report the baseline-normalized score along iterations: It normalizes the score so that 0% corresponds to a random score, and 100% to a given baseline. It is defined for one task as  $\text{score} = \frac{\text{score}_{\text{algorithm}} - \text{score}_{\text{random}}}{\text{score}_{\text{baseline}} - \text{score}_{\text{random}}}$ , where the baseline is the best version of SAC on Mujoco and Adroit after 20M steps. We then report aggregated results, showing the mean and median of these normalized scores along the tasks. Each score is reported as the average over 20 random seeds. For each experiment, the corresponding standard deviation is reported in B.3

**IQ algorithms.** We implement IQ with the Acme [Hoffman et al., 2020] codebase. It defines two deep neural networks, a policy network  $\pi_{\theta}$  and a value network  $V_{\phi}$ . IQ interacts with the environment through  $\pi_{\theta}$ , and collect transitions that are stored in a FIFO replay buffer. At each interaction, IQ updates  $\theta$  and  $\phi$  by performing a step of stochastic gradient descent with Adam [Kingma and Ba, 2015] on  $\mathcal{L}_{\text{IQ}}$  (Eq. (2)). During each step, IQ updates a copy of the weights  $\theta$ ,  $\bar{\theta}$ , with a smooth

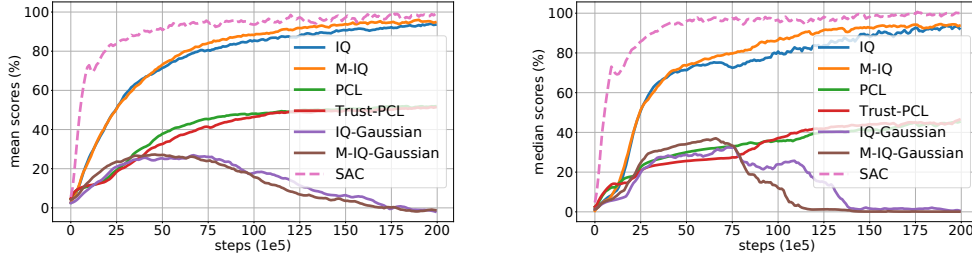

Figure 2: SAC-normalized scores on Gym. **Left:** Mean scores. **Right:** Median scores.

322 update  $\bar{\theta} \leftarrow (1 - \lambda)\bar{\theta} + \lambda\theta$ , with  $\lambda \in (0, 1)$ . It tracks a similar copy  $\bar{\phi}$  of  $\phi$ . We keep almost all  
 323 common hyperparameters (networks architecture,  $\lambda$ , etc.) the same as our main baseline, SAC. We  
 324 only adjust the learning rate for two tasks, Humanoid and Walker, where we used a lower value: we  
 325 found that IQ benefits from this, while for SAC we did not observe any improvement (we provide  
 326 more details and complete results in Appx. B.3). Our value network has the same architecture as the  
 327 SAC  $Q$ -networks except that the input size is only the state size (as it does not depend on the action).  
 328 The policy network has the same architecture as the SAC policy network, and differs only by its  
 329 output: IQ policy outputs a multicategorical policy (so  $n \cdot d$  values, where  $d$  is the dimensionality of  
 330 the action space and  $n$  is the number of discrete action on each dimension), while SAC policy outputs  
 331 2  $d$ -dimensional vectors (mean and diagonal covariance matrix of a Gaussian). We use  $n = 11$  in our  
 332 experiments. IQ introduces two hyperparameters,  $\alpha$  and  $\tau$ . We tested several values of  $\tau$  between  
 333  $10^{-4}$  and 1, and selected a value per task suite: we use  $\tau = 0.01$  on Mujoco tasks and  $\tau = 0.001$  on  
 334 Adroit. We tested values of  $\alpha$  in  $\{0., 0.1, 0.5, 0.9, 0.99\}$ . To make the distinction between the cases  
 335 when  $\alpha = 0$  and  $\alpha > 0$ , we denote IQ( $\alpha > 0$ ) as M-IQ, for Munchausen-IQ, since it makes use of  
 336 the Munchausen regularization term. For M-IQ, we found  $\alpha = 0.9$  to be the best performing value,  
 337 which is consistent with the findings of Vieillard et al. [2020b]. We report results for non-optimal  
 338 values of  $\tau$  in the ablation study (Section 6). Extended explanations are provided in Appendix B.2.

339 **Baselines.** On continuous control tasks, our main baseline is SAC, as it reaches state-of-the-art  
 340 performance on Mujoco tasks. We compare to the version of SAC that uses an adaptive temperature for  
 341 reference, but note that for IQ we keep a fixed temperature ( $\tau$ ) setting. To reach its best performance,  
 342 SAC either uses a specific temperature value per task, or an adaptive scheme that controls the entropy  
 343 of the policy. This method could be extended to multicategorical policies, but we leave this for  
 344 future work, and for IQ we use the same value of  $\tau$  for all tasks of an environment ( $10^{-2}$  on Gym,  
 345  $10^{-3}$  on Adroit). We use SAC with the default parameters from Haarnoja et al. [2018b] on Gym,  
 346 and a specifically tuned version of SAC on Adroit. Remarkably, SAC and IQ work with similar  
 347 hyperparameter ranges on both benchmarks. We only found that using a learning rate of  $3 \cdot 10^{-5}$   
 348 (instead of  $3 \cdot 10^{-4}$ ) gave better performance on Adroit. We also compare IQ to Trust-PCL. It is the  
 349 closest algorithm to IQ, with a similar parametrization. To be fair, we compare to our version of  
 350 Trust-PCL, which is essentially a residual version of IQ, where the target value network  $V_{\bar{\phi}}$  is replaced  
 351 by the online one. We use Trust-PCL with a fixed temperature, and we tuned this temperature to the  
 352 environment. We found that Trust-PCL reaches its best performance with significantly lower values  
 353 of  $\tau$  compared to IQ. In the ablation (Fig. 2) we used  $\tau = 10^{-4}$  for PCL and Trust-PCL.

354 **Comparison to baselines.** We report aggregated results of IQ and M-IQ on Gym in Fig. 2 and  
 355 on Adroit in Fig. 3, and corresponding standard deviations in Appx. B.3. IQ reaches competitive  
 356 performance to SAC. It is less sample efficient on Gym (SAC reaches higher performance sooner),  
 357 but faster on Adroit, and IQ reaches a close final performance on both environments. These results  
 358 also show the impact of the  $\alpha$  parameter. Although the impact of the Munchausen term (*i.e* KL  
 359 regularization) might not seem as impressive as in discrete actions, these results show that using that  
 360 term is never detrimental, and can even bring a slight improvement on Gym; while it does not add  
 361 any compute complexity to the algorithm. We also report scores on each individual task in Appx. B.3,  
 362 along with in-depth discussion on the performance and the impact of hyperparameters.



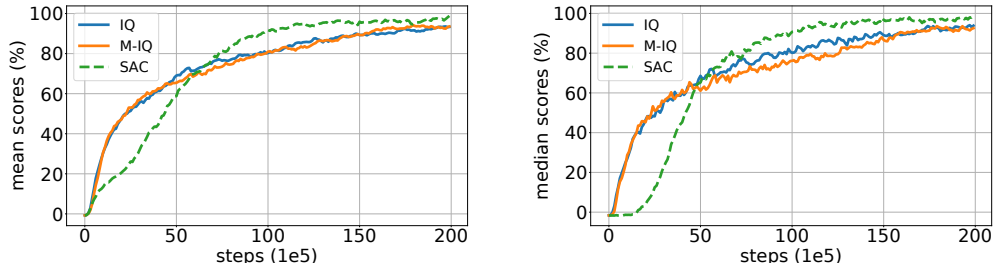

Figure 3: SAC-normalized scores on Adroit. **Left:** Mean scores. **Right:** Median scores.

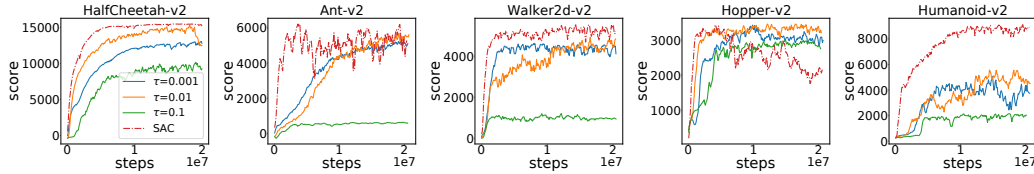

Figure 4: Influence of  $\tau$  on IQ with  $\alpha = 0$ .

**Influence of the temperature.** We study the influence of the temperature on the Mujoco tasks in Fig. 4. We report the score of IQ for several values of  $\tau$  (with  $\alpha = 0$  here, and with  $\alpha > 0$  in Appx.B.3), on all environments of Mujoco. It shows that  $\tau$  needs to be selected carefully: while it helps learning, too high values of  $\tau$  can be detrimental to the performance, and it highlights that its optimal value might be dependant on the task. Another observation is that  $\tau$  has a much stronger influence on IQ than  $\alpha$ . This is a key empirical difference regarding the performance of M-DQN [Vieillard et al., 2020b]. M-DQN shares similar  $\tau$  and  $\alpha$  parameters, but is specific to discrete actions. It benefits from a high value of  $\alpha$ : M-DQN with  $\alpha = 0.9$  largely outperforms M-DQN with  $\alpha = 0$  on the Atari benchmark. While this term still has effect in IQ on some tasks, it is empirically less useful, even though it is never detrimental; this discrepancy is yet to be understood.

**Ablation study.** We perform an ablation on important components of IQ in Fig. 2. (1) We replace the target network by its online counterpart in Eq. (2), which gives us Trust-PCL (and PCL is obtained by setting  $\alpha = 0$ ), a residual version of our method. IQ and M-IQ both outperform Trust-PCL and PCL on Mujoco. (2) We use a Gaussian parametrization of the policy instead of a multicategorical distribution. We observe on Fig. 2 that this causes the performance to drop drastically. This empirically validates the considerations about the necessary complexity of the policy from Section 4.

## 7 Conclusion

We introduced IQ, a parametrization of a  $Q$ -value that mechanically preserves the softmax relation between a policy and an implicit  $Q$ -function. Building on this parametrization, we derived an off-policy algorithm, that learns a policy and a value by minimizing a single loss, in a fixed-point fashion. We provided insightful analysis that justifies our parametrization and the algorithm. Specifically, IQ performs entropy and (implicit) KL regularization on the policy. While this kind of regularization had already been used and analyzed in RL, it was limited by the difficulty of estimating the softmax of  $Q$ -function in continuous action settings. IQ ends this limitation by avoiding any approximation in this softmax, effectively extending the analysis of this regularization. This parametrization comes at a cost: it shifts the representation capacity from the  $Q$ -network to the policy, which makes the use of Gaussian representation ineffective. We solved this issue by considering simple multicategorical policies, which allowed IQ to reach performance comparable to state-of-the-art methods on classic continuous control benchmarks. Yet, we envision that studying even richer policy classes may results in even better performance. In the end, this work brings together theory and practice: IQ is a theory-consistent manner of implementing an algorithm based on regularized VI in continuous actions settings.

## References

- Abbas Abdolmaleki, Jost Tobias Springenberg, Yuval Tassa, Remi Munos, Nicolas Heess, and Martin Riedmiller. Maximum a posteriori policy optimisation. In *International Conference on learning Representations (ICLR)*, 2018.
- Ilge Akkaya, Marcin Andrychowicz, Maciek Chociej, Mateusz Litwin, Bob McGrew, Arthur Petron, Alex Paino, Matthias Plappert, Glenn Powell, Raphael Ribas, et al. Solving rubik’s cube with a robot hand. *arXiv preprint arXiv:1910.07113*, 2019.
- Marc G Bellemare, Georg Ostrovski, Arthur Guez, Philip S Thomas, and Rémi Munos. Increasing the action gap: New operators for reinforcement learning. In *AAAI Conference on Artificial Intelligence (AAAI)*, 2016.
- Dimitri P Bertsekas and John N Tsitsiklis. *Neuro dynamic programming*. Athena Scientific Belmont, MA, 1996.
- Greg Brockman, Vicki Cheung, Ludwig Pettersson, Jonas Schneider, John Schulman, Jie Tang, and Wojciech Zaremba. Openai gym. *arXiv preprint arXiv:1606.01540*, 2016.
- Jonas Degraeve, Abbas Abdolmaleki, Jost Tobias Springenberg, Nicolas Heess, and Martin Riedmiller. Quinoa: a q-function you infer normalized over actions. *Deep RL Workshop at NeurIPS*, 2018.
- Scott Fujimoto, Herke Hoof, and David Meger. Addressing function approximation error in actor-critic methods. In *International Conference on Machine Learning (ICML)*, pages 1587–1596. PMLR, 2018.
- Matthieu Geist, Bilal Piot, and Olivier Pietquin. Is the bellman residual a bad proxy? *Advances in Neural Information Processing Systems (NeurIPS)*, 2017.
- Matthieu Geist, Bruno Scherrer, and Olivier Pietquin. A Theory of Regularized Markov Decision Processes. In *International Conference on Machine Learning (ICML)*, 2019.
- Shixiang Gu, Timothy Lillicrap, Ilya Sutskever, and Sergey Levine. Continuous deep q-learning with model-based acceleration. In *International Conference on Machine Learning (ICML)*, 2016.
- Tuomas Haarnoja, Aurick Zhou, Pieter Abbeel, and Sergey Levine. Soft actor-critic: Off-policy maximum entropy deep reinforcement learning with a stochastic actor. In *International Conference on Machine Learning (ICML)*, 2018a.
- Tuomas Haarnoja, Aurick Zhou, Kristian Hartikainen, George Tucker, Sehoon Ha, Jie Tan, Vikash Kumar, Henry Zhu, Abhishek Gupta, Pieter Abbeel, et al. Soft actor-critic algorithms and applications. *arXiv preprint arXiv:1812.05905*, 2018b.
- Matteo Hessel, Joseph Modayil, Hado Van Hasselt, Tom Schaul, Georg Ostrovski, Will Dabney, Dan Horgan, Bilal Piot, Mohammad Azar, and David Silver. Rainbow: Combining improvements in deep reinforcement learning. In *AAAI Conference on Artificial Intelligence (AAAI)*, 2018.
- Jean-Baptiste Hiriart-Urruty and Claude Lemaréchal. *Fundamentals of convex analysis*. Springer Science & Business Media, 2004.
- Matt Hoffman, Bobak Shahriari, John Aslanides, Gabriel Barth-Maron, Feryal Behbahani, Tamara Norman, Abbas Abdolmaleki, Albin Cassirer, Fan Yang, Kate Baumli, Sarah Henderson, Alex Novikov, Sergio Gómez Colmenarejo, Serkan Cabi, Caglar Gulcehre, Tom Le Paine, Andrew Cowie, Ziyu Wang, Bilal Piot, and Nando de Freitas. Acme: A research framework for distributed reinforcement learning. *arXiv preprint arXiv:2006.00979*, 2020. URL <https://arxiv.org/abs/2006.00979>.
- Diederik P Kingma and Jimmy Ba. Adam: A method for stochastic optimization. In *International Conference for Learning Representations (ICLR)*, 2015.
- Luke Metz, Julian Ibarz, Navdeep Jaitly, and James Davidson. Discrete sequential prediction of continuous actions for deep rl. *arXiv preprint arXiv:1705.05035*, 2017.

440 Volodymyr Mnih, Koray Kavukcuoglu, David Silver, Andrei A Rusu, Joel Veness, Marc G Bellemare,  
441 Alex Graves, Martin Riedmiller, Andreas K Fidjeland, Georg Ostrovski, et al. Human-level control  
442 through deep reinforcement learning. *Nature*, 518(7540):529, 2015.

443 Ofir Nachum, Mohammad Norouzi, Kelvin Xu, and Dale Schuurmans. Bridging the gap between  
444 value and policy based reinforcement learning. *Advances in Neural Information Processing Systems*  
445 (*NeurIPS*), 2017.

446 Ofir Nachum, Mohammad Norouzi, Kelvin Xu, and Dale Schuurmans. Trust-pcl: An off-policy trust  
447 region method for continuous control. *International Conference on Learning Representations*  
448 (*ICLR*), 2018.

449 Aravind Rajeswaran, Vikash Kumar, Abhishek Gupta, Giulia Vezzani, John Schulman, Emanuel  
450 Todorov, and Sergey Levine. Learning complex dexterous manipulation with deep reinforcement  
451 learning and demonstrations. *arXiv preprint arXiv:1709.10087*, 2017.

452 Danilo Rezende and Shakir Mohamed. Variational inference with normalizing flows. In *International*  
453 *Conference on Machine Learning (ICML)*. PMLR, 2015.

454 Bruno Scherrer, Mohammad Ghavamzadeh, Victor Gabillon, Boris Lesner, and Matthieu Geist.  
455 Approximate modified policy iteration and its application to the game of Tetris. *Journal of Machine*  
456 *Learning Research*, 16:1629–1676, 2015.

457 Yunhao Tang and Shipra Agrawal. Discretizing continuous action space for on-policy optimization.  
458 In *AAAI Conference on Artificial Intelligence 5AAAI*, volume 34, pages 5981–5988, 2020.

459 Nino Vieillard, Tadashi Kozuno, Bruno Scherrer, Olivier Pietquin, Rémi Munos, and Matthieu Geist.  
460 Leverage the average: an analysis of kl regularization in rl. In *Advances in Neural Information*  
461 *Processing Systems (NeurIPS)*, 2020a.

462 Nino Vieillard, Olivier Pietquin, and Matthieu Geist. Munchausen reinforcement learning. *Advances*  
463 *in Neural Information Processing Systems (NeurIPS)*, 2020b.

464 Ziyu Wang, Tom Schaul, Matteo Hessel, Hado Hasselt, Marc Lanctot, and Nando Freitas. Dueling  
465 network architectures for deep reinforcement learning. In *International conference on machine*  
466 *learning (ICML)*, pages 1995–2003. PMLR, 2016.

467 Patrick Nadeem Ward, Ariella Smofsky, and Avishek Joey Bose. Improving exploration in soft-actor-  
468 critic with normalizing flows policies. *arXiv preprint arXiv:1906.02771*, 2019.

469 Christopher JCH Watkins and Peter Dayan. Q-learning. *Machine learning*, 8(3-4):279–292, 1992.

470 Brian D Ziebart. *Modeling Purposeful Adaptive Behavior with the Principle of Maximum Causal*  
471 *Entropy*. PhD thesis, University of Washington, 2010.

## 472 A Analysis

473 This Appendix provides details and proofs on the IQ paramterization.

474 **Reminder on notations.** Throughout the Appendix, we use the following notations. Recall that  
 475 we defined the action dot product as, for any  $u$  and  $v \in \mathbb{R}^{\mathcal{S} \times \mathcal{A}}$ ,

$$\langle u, v \rangle = \left( \sum_{a \in \mathcal{A}} u(s, a) v(s, a) \right)_s \in \mathbb{R}^{\mathcal{S}}.$$

476 We also slightly overwrite the  $+$  operator. Precisely, for any  $Q \in \mathbb{R}^{\mathcal{S} \times \mathcal{A}}$ ,  $V \in \mathbb{R}^{\mathcal{S}}$ , we define  
 477  $Q + V \in \mathbb{R}^{\mathcal{S} \times \mathcal{A}}$  as

$$\forall (s, a) \in \mathcal{S} \times \mathcal{A}, (Q + V)(s, a) = Q(s, a) + V(s).$$

478 Write  $\mathbf{1} \in \mathbb{R}^{\mathcal{S} \times \mathcal{A}}$  the constant function of value 1. For any  $Q \in \mathbb{R}^{\mathcal{S} \times \mathcal{A}}$ , we define the softmax  
 479 operator as

$$\text{softmax}(Q) = \frac{\exp(Q)}{\langle \mathbf{1}, \exp Q \rangle} \in \mathbb{R}^{\mathcal{S} \times \mathcal{A}},$$

480 where the fraction is overwritten as the addition operator, that is for any state-action pair  $(s, a)$ ,

$$\text{softmax}(Q)(a|s) = \frac{\exp Q(s, a)}{\sum_{a' \in \mathcal{A}} \exp Q(s, a')}.$$

### 481 A.1 About the softmax consistency

482 First, we provide a detailed explanation of the consistency of the IQ parametrization. In Section 2,  
 483 we claim that parametrizing a  $Q$ -value as  $Q = \tau \ln \pi + V$  enforces the relation  $\pi = \text{softmax}(Q/\tau)$ .  
 484 This relation comes mechanically from the constraint that  $\pi$  is a distribution over actions. For the  
 485 sake of precision, we provide a detailed proof of this claim as formalized in the following lemma.

486 **Lemma 1.** For any  $Q \in \mathbb{R}^{\mathcal{S} \times \mathcal{A}}$ ,  $\pi \in \Delta_{\mathcal{A}}^{\mathcal{S}}$ ,  $V \in \mathbb{R}^{\mathcal{S}}$ , we have

$$Q = \tau \ln \pi + V \Leftrightarrow \begin{cases} \pi = \text{softmax}(\frac{Q}{\tau}) \\ V = \tau \ln \langle \mathbf{1}, \exp \frac{Q}{\tau} \rangle \end{cases} \quad (4)$$

487 *Proof.* Directly from the left hand side (l.h.s.) of Eq. (4), we have

$$\pi = \exp \frac{Q - V}{\tau}.$$

488 Since  $\pi \in \Delta_{\mathcal{A}}^{\mathcal{S}}$  ( $\pi$  is a distribution over the actions), we have

$$\begin{aligned} \langle \mathbf{1}, \pi \rangle &= 1 \Leftrightarrow \langle \mathbf{1}, \exp \frac{Q - V}{\tau} \rangle = 1 \\ &\Leftrightarrow \left( \exp \frac{-V}{\tau} \right) \langle \mathbf{1}, \exp \frac{Q}{\tau} \rangle = 1 \quad (V \text{ does not depend on the actions}) \\ &\Leftrightarrow V = \tau \ln \langle \mathbf{1}, \exp \frac{Q}{\tau} \rangle. \end{aligned}$$

489 And, for the policy, this gives

$$\pi = \exp \frac{Q - V}{\tau} = \exp \frac{Q - \tau \ln \langle \mathbf{1}, \exp \frac{Q}{\tau} \rangle}{\tau} = \frac{\exp(\frac{Q}{\tau})}{\langle \mathbf{1}, \exp \frac{Q}{\tau} \rangle} = \text{softmax} \frac{Q}{\tau}.$$

490 It concludes the proof. □

## 491 A.2 Useful properties of KL-entropy-regularized optimization

492 The following proofs relies on some properties of the KL divergence and of the entropy. Consider the  
493 greedy step of MD-VI( $(1 - \alpha)\tau, \alpha\tau$ ), defined in Thm. 1

$$\pi_{k+2} = \operatorname{argmax}_{\pi \in \Delta_{\mathcal{A}}} \langle \pi, r + \gamma PV_k \rangle + (1 - \alpha)\tau \mathcal{H}(\pi) - \alpha\tau \operatorname{KL}(\pi || \pi_{k+1}). \quad (5)$$

494 Since the function  $\pi \rightarrow (1 - \alpha)\tau \mathcal{H}(\pi) - \alpha\tau \operatorname{KL}(\pi || \pi_{k+1})$  is concave in  $\pi$ , this optimization problem  
495 can be tackled using properties of the Legendre-Fenchel transform (see for example Hiriart-Urruty  
496 and Lemaréchal [2004, Chap. E] for general definition and properties, and Vieillard et al. [2020a,  
497 Appx. A] for application to our setting). We quickly state two properties that are of interest for this  
498 work in the following Lemma.

499 **Lemma 2.** *Consider the optimization problem of Eq. (5). Write  $Q_{k+1} = r + \gamma PV_k$ , we have that*

$$\pi_{k+2} = \frac{\pi_{k+1}^\alpha \exp \frac{Q_{k+1}}{\alpha}}{\left\langle \mathbf{1}, \pi_{k+1}^\alpha \exp \frac{Q_{k+1}}{\alpha} \right\rangle}.$$

500 We also get a relation between the maximizer and the maximum

$$\langle \pi_{k+2}, r + \gamma PV_k \rangle + (1 - \alpha)\tau \mathcal{H}(\pi) - \alpha\tau \operatorname{KL}(\pi || \pi_{k+1}) = \tau \ln \left\langle \pi_{k+1}^\alpha, \exp \frac{Q_{k+1}}{\tau} \right\rangle.$$

501 *Proof.* See Vieillard et al. [2020a, Appx. A].

502 □

## 503 A.3 Equivalence to MD-VI: proof of Theorem 1

504 We turn to the proof of Thm 1. This result formalizes an equivalence in the exact case between the  
505 IQ-DP scheme and a VI scheme regularized by entropy and KL divergence. Recall that we define the  
506 update of IQ-DP at step  $k$  as

$$\tau \ln \pi_{k+2} + V_{k+1} = r + \alpha\tau \ln \pi_{k+1} + \gamma PV_k \quad \text{IQ-DP}(\alpha, \tau). \quad (6)$$

507 Note that we are for now considering the scenario where this update is computed exactly. We will  
508 consider errors later, in Thm 2. Recall Thm. 1.

509 **Theorem 1.** *For any  $k \geq 1$ , let  $(\pi_{k+2}, V_{k+1})$  be the solution of IQ-DP at step  $k$ . We have that*

$$\begin{cases} \pi_{k+2} = \operatorname{argmax} \langle \pi, r + \gamma PV_k \rangle + (1 - \alpha)\tau \mathcal{H}(\pi) - \alpha\tau \operatorname{KL}(\pi || \pi_{k+1}) \\ V_{k+1} = \langle \pi_{k+2}, r + \gamma PV_k \rangle + (1 - \alpha)\tau \mathcal{H}(\pi_{k+2}) - \alpha\tau \operatorname{KL}(\pi_{k+2} || \pi_{k+1}) \end{cases}$$

510 so IQ-DP( $\alpha, \tau$ ) produces the same sequence of policies as a value-based version of Mirror Descent  
511 VI, MD-VI( $\alpha\tau, (1 - \alpha)\tau$ ) [Vieillard et al., 2020a].

512 *Proof.* Applying Lemma 1 to Eq. (6) gives

$$\begin{cases} \pi_{k+2} = \operatorname{softmax} \frac{r + \alpha\tau \ln \pi_{k+1} + \gamma PV_k}{\tau} \\ V_{k+1} = \tau \ln \left\langle \mathbf{1}, \exp \frac{r + \alpha\tau \ln \pi_{k+1} + \gamma PV_k}{\tau} \right\rangle. \end{cases}$$

513 For the policy, we have

$$\pi_{k+2} = \frac{\exp(\alpha \ln \pi_{k+1}) \exp \frac{r + \gamma PV_k}{\alpha}}{\left\langle \mathbf{1}, \exp(\alpha \ln \pi_{k+1}) \exp \frac{r + \gamma PV_k}{\alpha} \right\rangle} = \frac{\pi_{k+1}^\alpha \exp \frac{r + \gamma PV_k}{\alpha}}{\left\langle \mathbf{1}, \pi_{k+1}^\alpha \exp \frac{r + \gamma PV_k}{\alpha} \right\rangle},$$

514 and as direct consequence of Lemma 2

$$\pi_{k+2} = \operatorname{argmax} \langle \pi, r + \gamma PV_k \rangle + (1 - \alpha)\tau \mathcal{H}(\pi) - \alpha\tau \operatorname{KL}(\pi || \pi_{k+1}).$$

515 For the value, we have:

$$V_{k+1} = \tau \ln \left\langle \mathbf{1}, \exp(\alpha \ln \pi_{k+1}) \exp \frac{r + \gamma PV_k}{\tau} \right\rangle = \tau \ln \left\langle \pi_{k+1}^\alpha, \exp \frac{r + \gamma PV_k}{\tau} \right\rangle,$$

516 and again applying Lemma 2 gives

$$V_{k+1} = \langle \pi_{k+2}, r + \gamma PV_k \rangle + (1 - \alpha)\tau \mathcal{H}(\pi_{k+2}) - \alpha\tau \operatorname{KL}(\pi_{k+2} || \pi_{k+1}).$$

517 □

#### 518 A.4 Error propagation: proof of Theorem 2

519 Now we turn to the proof of Thm 2. This theorem handles the IQ-DP scheme in the approximate  
520 case, when errors are made during the iterations. The considered scheme is

$$\tau \ln \pi_{k+2} + V_{k+1} = r + \alpha \tau \ln \pi_{k+1} + \gamma P V_k + \epsilon_{k+1}. \quad (7)$$

521 Recall Thm. 2.

522 **Theorem 2.** Write  $\pi_{k+1}$  and  $V_k$  the  $k^{th}$  update of respectively the target policy and value networks.  
523 Consider the error at step  $k$ ,  $\epsilon_k \in \mathbb{R}^{S \times A}$ , as the difference between the ideal and the actual updates  
524 of IQ. Formally, we define the error as, for all  $k \geq 1$ ,

$$\epsilon_{k+1} = \tau \ln \pi_{k+2} + V_{k+1} - (r + \alpha \tau \ln \pi_{k+1} + \gamma P V_k),$$

525 and the moving average of the errors as

$$E_k = (1 - \alpha) \sum_{j=1}^k \alpha^{k-j} \epsilon_j.$$

526 We have the following results for two different cases depending on the value of  $\alpha$ . Note that when  
527  $\alpha < 1$ , we bound the distance to regularized optimal  $Q$ -value.

528 1. General case:  $0 < \alpha < 1$  and  $\tau > 0$ , entropy and KL regularization together:

$$\|Q_*^{(1-\alpha)\tau} - Q_{\pi_k}^{(1-\alpha)\tau}\|_\infty \leq \frac{2}{(1-\gamma)^2} \left( (1-\gamma) \sum_{j=1}^k \gamma^{k-j} \|E_j\|_\infty \right) + o\left(\frac{1}{k}\right).$$

529 2. Specific case  $\alpha = 1$ ,  $\tau > 0$ , use of KL regularization alone:

$$\|Q_* - Q_{\pi_k}\|_\infty \leq \frac{2}{1-\gamma} \left\| \frac{1}{k} \sum_{j=1}^k \epsilon_j \right\|_\infty + O\left(\frac{1}{k}\right).$$

530 *Proof.* To prove this error propagation result, we first show an extension of Thm. 1, that links  
531 Approximate IQ-DP with a  $Q$ -value based version of MD-VI. This new equivalence makes IQ-DP  
532 corresponds exactly to a scheme that is extensively analyzed by Vieillard et al. [2020a]. Then our  
533 result can be derived as a consequence of [Vieillard et al., 2020a, Thm 1] and [Vieillard et al., 2020a,  
534 Thm 2].

535 Define a (KL-regularized) implicit  $Q$ -value as

$$Q_k = \tau \ln \pi_{k+1} - \alpha \tau \ln \pi_k + V_k,$$

536 so that now, the IQ-DP update (Eq. (7)) can be written

$$Q_{k+1} = r + \gamma P V_k + \epsilon_{k+1}. \quad (8)$$

537 We then use same method that for the proof of Thm. 1. Specifically, applying Lemma 1 to the  
538 definition of  $Q_k$  gives for the policy

$$\begin{aligned} \pi_{k+1} &= \text{softmax} \left( \frac{Q_k + \alpha \tau \ln \pi_k}{\tau} \right) \quad (\text{Lemma 1}) \\ &= \frac{\pi_k^\alpha \exp \frac{Q_k}{\alpha}}{\left\langle \mathbf{1}, \pi_k^\alpha \exp \frac{Q_k}{\alpha} \right\rangle} \\ &\Leftrightarrow \pi_{k+1} = \text{argmax} \langle \pi, Q_k \rangle + (1-\alpha)\tau \mathcal{H}(\pi) - \alpha \tau \text{KL}(\pi \| \pi_k). \quad (\text{Lemma 2}) \end{aligned}$$

539 For the value, we have from Lemma 1 on  $Q_k$

$$V_k = \tau \ln \left\langle \mathbf{1}, \exp \frac{Q_k + \alpha \tau \ln \pi_k}{\tau} \right\rangle = \tau \ln \left\langle \pi_k^\alpha, \exp \frac{Q_k}{\tau} \right\rangle,$$

then, using Lemma 2, and the fact that  $\pi_{k+1} = \text{softmax} \frac{Q_k}{\tau}$ , we have

$$V_k = \langle \pi_{k+1}, Q_k \rangle + (1 - \alpha)\tau \mathcal{H}(\pi_{k+1}) - \alpha\tau \text{KL}(\pi_{k+1} || \pi_k).$$

Injecting this in Eq. (8) gives

$$Q_{k+1} = r + \gamma P(\langle \pi_{k+1}, Q_k \rangle + (1 - \alpha)\tau \mathcal{H}(\pi_{k+1}) - \alpha\tau \text{KL}(\pi_{k+1} || \pi_k)).$$

Thus, we have proved the following equivalence between DP schemes

$$\begin{aligned} \tau \ln \pi_{k+2} + V_{k+1} &= r + \alpha\tau \ln \pi_{k+1} + \gamma P V_k + \epsilon_{k+1} \\ &\Updownarrow \\ \begin{cases} \pi_{k+1} = \text{argmax} \langle \pi, Q_k \rangle + (1 - \alpha)\tau \mathcal{H}(\pi) - \alpha\tau \text{KL}(\pi || \pi_k) \\ Q_{k+1} = r + \gamma P(\langle \pi_{k+1}, Q_k \rangle + (1 - \alpha)\tau \mathcal{H}(\pi_{k+1}) - \alpha\tau \text{KL}(\pi_{k+1} || \pi_k)) + \epsilon_{k+1}, \end{cases} \end{aligned} \quad (9)$$

with

$$Q_k = \tau \ln \pi_{k+1} - \alpha\tau \ln \pi_k + V_k.$$

The above scheme in Eq. (9) is exactly the MD-VI scheme studied by Vieillard et al. [2020a], where they define  $\beta = \alpha$  and  $\lambda = \alpha\tau$ . We now use their analysis of MD-VI to apply their result to IQ-DP, building on the equivalence between the schemes. Note that transferring this type of analysis between equivalent formulations of DP schemes is justified because the equivalences exist in terms of *policies*. Indeed, IQ-DP and MD-VI compute different ( $Q$ )-values, but produce *identical series of policies*. Since [Vieillard et al., 2020a, Thm 1] and [Vieillard et al., 2020a, Thm. 2] bound the distance between the optimal (regularized)  $Q$ -value and the actual (regularized)  $Q$ -values of the computed policy, the equivalence in terms of policies is sufficient to apply these theorems to IQ-DP. Specifically, [Vieillard et al., 2020a, Thm 1] applied to the formulation of IQ in Eq. (9) proves point 1 of Thm. 2, that is the case where  $\alpha = 0$ . The second part is proven by applying [Vieillard et al., 2020a, Thm 2] to this same formulation.

□

## A.5 IQ and Munchausen DQN

We claim in Section 3 that IQ is a form of Munchausen algorithm, specifically Munchausen-DQN (M-DQN). Here, we clarify this link. Note that all of the information below is contained in Appx. A.3 and Appx. A.4. The point of this section is to re-write it using notations used to defined IQ as a deep RL agents, notations consistent with how M-DQN is defined.

IQ optimizes a policy  $\pi_\theta$  and a value  $V_\phi$  by minimizing a loss  $\mathcal{L}_{\text{IQ}}$  (Eq. (2)). Recall that IQ implicitly defines a  $Q$ -function as  $Q_{\pi, \theta} = \tau \ln \pi_\theta + V_\phi$ . Identifying this in  $\mathcal{L}_{\text{IQ}}$  makes the connection between Munchausen RL and IQ completely clear. Indeed, the loss can be written as

$$\hat{\mathbb{E}} \left[ \left( r_t + \alpha\tau \ln \pi_{\bar{\theta}}(a_t | s_t) + \underbrace{\frac{\gamma V_{\bar{\phi}}(s_{t+1})}{\tau \ln \sum_a \exp \frac{Q_{\bar{\theta}, \bar{\phi}}(s_{t+1}, a)}}}_{Q_{\bar{\theta}, \bar{\phi}}(s_{t+1}, a)} - \underbrace{\tau \ln \pi_\theta(a_t | s_t) - V_\phi(s_t)}_{Q_{\theta, \phi}(s_t, a_t)} \right)^2 \right],$$

and since we have (Lemma 2, and using the fact that  $\pi_{\bar{\theta}} = \text{softmax}(Q_{\bar{\theta}, \bar{\phi}}/\tau)$ )

$$\tau \ln \sum_a \exp \frac{Q_{\bar{\theta}, \bar{\phi}}(s, a)}{\tau} = \sum_a \pi_{\bar{\theta}}(a | s) (Q_{\bar{\theta}, \bar{\phi}}(s, a) - \tau \ln \pi_{\bar{\theta}, \bar{\phi}}(a | s)),$$

we get that the loss is

$$\hat{\mathbb{E}} \left[ \left( r_t + \alpha\tau \ln \pi_{\bar{\theta}}(a_t | s_t) + \sum_a \pi_{\bar{\theta}}(a | s_{t+1}) (Q_{\bar{\theta}, \bar{\phi}}(s_{t+1}, a) - \tau \ln \pi_{\bar{\theta}}(a | s_{t+1})) - Q_{\theta, \phi}(s_t, a_t) \right)^2 \right],$$

which is exactly the Munchausen-DQN loss on  $Q_{\theta, \phi}$ . Thus, in a mono-dimensional action setting (classic discrete control problems for example), IQ can really be seen as a re-parameterized version of M-DQN.

## B Additional material on experiments

This Appendix provides additional detail on experiments, along with complete empirical results.

### B.1 General information on experiments

**Used assets.** IQ is implemented on the Acme library [Hoffman et al., 2020], distributed as open-source code under the Apache License (2.0).

**Compute resources.** Experiments were run on TPUv2. One TPU is used for a single run, with one random seed. To produce the main results (without the sweeps over parameters), we computed 780 single runs. One of this run on a TPUv2 takes from 3 to 10 hours depending on the environment (the larger the action space, the longer the run).

### B.2 Details on algorithms

**On the relation between  $\alpha$  and  $\tau$ .** The equivalence result of Theorem 1 explains the role and the relation between  $\tau$  and  $\alpha$ . In particular, it shows that  $\text{IQ-DP}(\alpha, \tau)$  performs a VI scheme in an entropy-regularized MDP (or in a max-entropy setting) where the temperature is not  $\tau$ , but  $(1 - \alpha)\tau$ . Indeed, in this framework, the  $\alpha$  parameter balances between two forms of regularization: with  $\alpha = 0$ , IQ-DP is only regularized with entropy, but with  $\alpha > 0$ , IQ-DP is regularized with both entropy and KL. Thus, IQ-DP modifies implicitly the intrinsic temperature of the MDP it is optimizing for. To account for this discrepancy, every time we evaluate IQ with  $\alpha > 0$  (that is, M-IQ), we report scores using  $\tau/(1 - \alpha)$ , and not  $\tau$ . For example, on Gym, we used a temperature of 0.01 for IQ, and thus 0.1 for M-IQ (since, in our experiments, we took  $\alpha = 0.9$ ).

**Discretization.** We used IQ with policies that discretize the action space evenly. Here, we provide a precise definition for our discretization method. Consider a multi-dimensional action space  $\mathcal{A}$  of dimension  $d$ , each dimension being a bounded interval  $[a_{\min}, a_{\max}]$ , such that  $\mathcal{A} = [a_{\min}, a_{\max}]^d$ . We discretize each dimension of the space uniformly in  $n$  values  $\delta_j$ , for  $0 \leq j \leq n - 1$ . The bins values are defined as

$$\delta_0 = a_{\min} + \frac{a_{\max} - a_{\min}}{2n},$$

and, for each  $j \in \{1, \dots, n - 1\}$ ,

$$\delta_j = \delta_0 + j \frac{a_{\max} - a_{\min}}{n}.$$

It effectively defines a discrete action space

$$\mathcal{A}' = \bigtimes_{j=1}^d \mathcal{A}_j, \quad \text{with} \quad \mathcal{A}_j = \{\delta_0, \dots, \delta_{n-1}\}.$$

We use  $n = 11$  in all of our experiments. The values of  $d$ ,  $a_{\min}$  and  $a_{\max}$  depend on the environments specifications.

**Evaluation setting.** We evaluate our algorithms on Mujoco environments from OpenAI Gym and from the Adroit manipulation tasks. On each environment, we track performance for 20M environment steps. Every 10k environment steps, we stop learning, and we evaluate our algorithm by reporting the average undiscounted return over 10 episodes. We use deterministic evaluation, meaning that, at evaluation time, the algorithms interact by choosing the expected value of the policy in one state, not by sampling from this policy (sampling is used during training).

**Pseudocode.** We provide a pseudocode of IQ in Algorithm 1. This pseudocode describes a general learning procedure that is followed by all agents. Replacing the IQ loss in Algorithm 1 by its residual version will give the pseudocode for PCL, and replacing it by the actor and critic losses of SAC will give the pseudocode for this method.

**HyperParameters.** We Provide the hyperparameters used for our experiments in Tab. 1. If a parameter is under “common parameters”, then it was used for all algorithms. We denote  $\text{FC}_n$  a fully connected layer with an output of  $n$  neurons. Recall that  $d$  is the dimension of the action space, and  $n$  is the number of bins we discretize each dimension into.



---

**Algorithm 1** Implicit Q-values

---

**Require:**  $T \in \mathbb{N}^*$  the number of environment steps,  $\lambda \in (0, 1)$  the update coefficient.

Initialize  $\theta, \phi$  at random

$\mathcal{B} = \{\}$

$\bar{\theta} = \theta$

$\bar{\phi} = \phi$

**for**  $t = 1$  **to**  $T$  **do**

Collect a transition  $b = (s_t, a_t, r_t, s_{t+1})$  from  $\pi_\theta$

$\mathcal{B} \leftarrow \mathcal{B} \cup \{b\}$

On a random batch of transitions  $B_t \subset \mathcal{B}$ , update  $(\theta, \phi)$  with one step of SGD on

$$\hat{\mathbb{E}}_{(s_t, a_t, r_t, s_{t+1}) \sim B_t} \left[ (r_t + \alpha \tau \ln \pi_{\bar{\theta}}(a_t | s_t) + \gamma V_{\bar{\phi}}(s_{t+1}) - \tau \ln \pi_\theta(a_t | s_t) - V_\phi(s_t))^2 \right],$$

$\bar{\theta} \leftarrow \lambda \bar{\theta} + (1 - \lambda) \theta$

$\bar{\phi} \leftarrow \lambda \bar{\phi} + (1 - \lambda) \phi$

**end for**

**return**  $\pi_\theta$

---

Table 1: Parameters used for algorithms and ablations.

| Parameter                                   | Value                                                 |
|---------------------------------------------|-------------------------------------------------------|
| Common parameters                           |                                                       |
| $\lambda$ (update coefficient)              | 0.05                                                  |
| $\gamma$ (discount)                         | 0.99                                                  |
| $ \mathcal{B} $ (replay buffer size)        | $10^6$                                                |
| $ B_t $ (batch size)                        | 256                                                   |
| activations                                 | Relu                                                  |
| optimizer                                   | Adam                                                  |
| learning rate                               | $3 \cdot 10^{-4}$ on Gym, $3 \cdot 10^{-5}$ on Adroit |
| IQ specific parameters                      |                                                       |
| $\tau$ (entropy temperature)                | 0.01 on Gym, 0.001 on Adroit                          |
| $\alpha$ (implicit KL term)                 | 0.9                                                   |
| $n$ (number of bins for the discretization) | 11                                                    |
| $\pi$ -network                              | (input: state) FC 512 – FC 512 – FC $nd$              |
| $V$ -network structure                      | (input: state) FC 512 – FC 512 – FC 1                 |
| (Trust)-PCL specific parameters             |                                                       |
| $\tau$ (entropy temperature)                | $1 \cdot 10^{-4}$ on Gym                              |
| $\pi$ -network and $V$ -network structures  | idem as IQ                                            |
| SAC specific parameters                     |                                                       |
| $\pi$ -network structure                    | (input: state) FC 512 – FC 512 – FC $2d$              |
| $Q$ -network structure                      | (input: state and action) FC 512 – FC 512 – FC 1      |

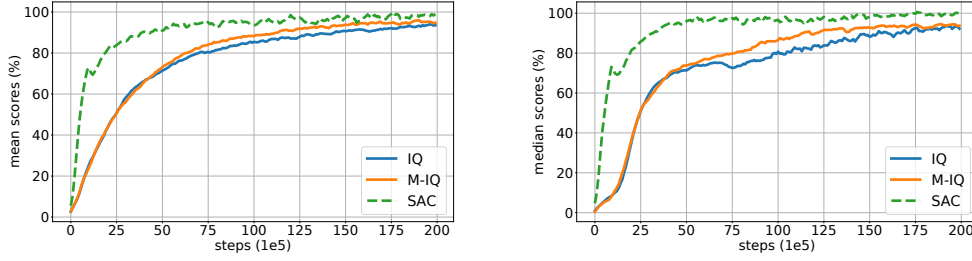

Figure 5: SAC-normalized aggregated scores on Gym environments. *Best parameters*: IQ uses a different learning rate for Humanoid-v2 and Walker2d-v2. **Left**: Mean scores. **Right**: Median scores.

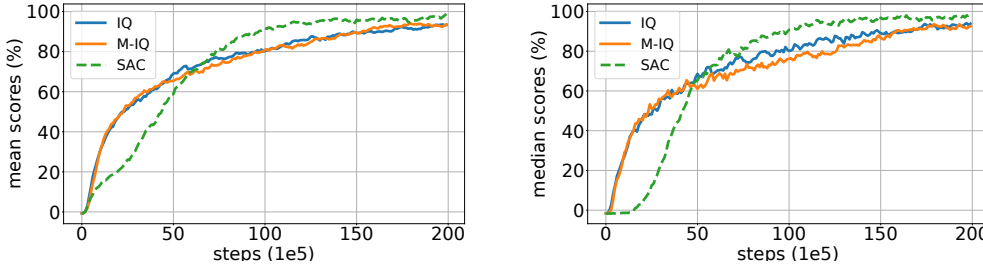

Figure 6: SAC-Normalized aggregated scores on Adroit. **Left**: Mean scores. **Right**: Median scores.

### B.3 Additional results

Here, we provide full results on each environments. We use this additional in formations (more detailed results, standard deviations) to also provide a more extensive analysis of our experiments.

**Aggregated scores.** Aggregated scores on Gym and Adroit environments are reported in Figures 10 and 6. We see from these results that (M)-IQ reaches performance close to SAC, but is still slightly below. On Gym, IQ is slower (as in less sample efficient) than SAC, but is faster on Adroit. One important thing to notice is that we compare to the best version of SAC we found, that uses an adaptive temperature, while we use the same fixed temperature for all of the environments. Experimentally, it appears that IQ is more sensitive to hyperparameters than SAC<sup>3</sup>. Notably, on Humanoid-v2 and Walker2d-v2, we show in Figure 7 that IQ can reach a much more competitive score by using a specific hyperparameter per environment. To reflect this, we use a learning rate of  $3 \cdot 10^{-5}$  instead of  $3 \cdot 10^{-4}$  for Humanoid and Walker, while still comparing to the best version of SAC we found (we also tested SAC with those parameters variations, but it did not improve the performance). This is reported as *best parameters* results in Fig. 5; and for completeness, we report score using *unique hyperparameters* in Fig. 10. On Adroit, we did not observe such variations, and thus we report scores with a single set of hyperparameters.

**Detailed scores.** We report detailed scores on Gym environments in Figure 8 and on Adroit in Figure 9. On this figures, the thick line corresponds to the average over 20 seeds, and the error bars represents  $\pm$  the empirical standard deviation over those seeds. It shows how the performance varies across environments. Specifically, IQ outperforms SAC on 3 of the 8 considered environments: Ant, Hopper, and Door. On the 5 others, SAC performs better, but IQ and M-IQ still reach a reasonable performance. Moreover, on almost all environments, all mean performances are within the same confidence interval (Humanoid, and to a less extent HalfCheetah, being notable exceptions, in favor of SAC).

<sup>3</sup>However, we note that SAC, when used with a fixed temperature, is sensitive to the choice of this parameter. It appears that IQ is less sensitive to this (we use the same temperature for all tasks), but a bit more to the learning rate. We think this may be alleviated by adopting other policy representations, such as normalizing flows, or by designing adaptive schemes. We left this for future works.

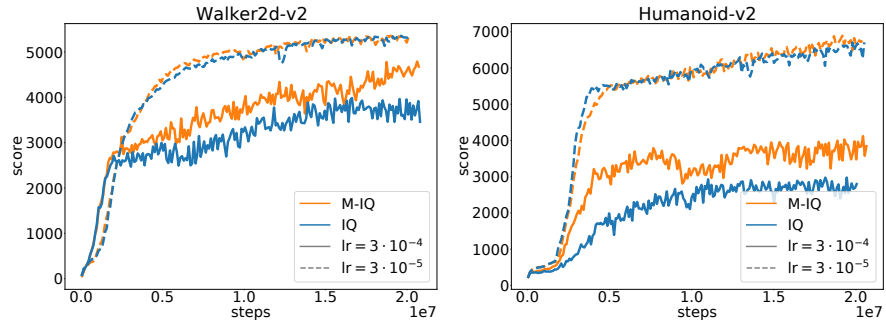

Figure 7: Comparison of two value of the learning rate ( $lr$ ) on IQ and M-IQ, on two environments. Each line corresponds to the average score over 20 seeds.

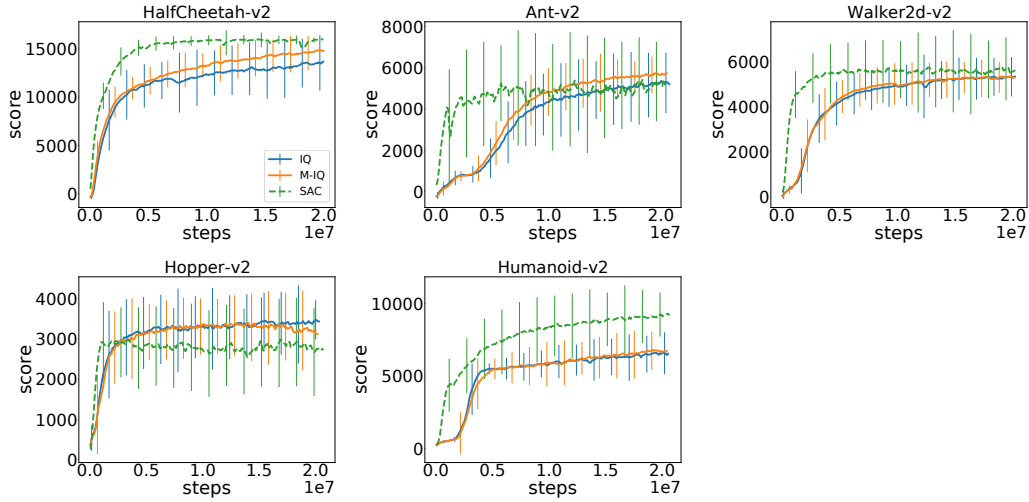

Figure 8: All individual scores on Gym. The vertical bars denote the empirical standard deviation over 20 seeds. *Best parameters*: IQ uses a different learning rate for Humanoid-v2 and Walker2d-v2.

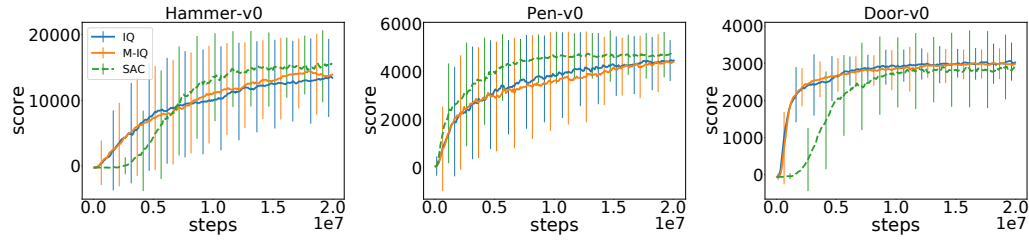

Figure 9: All scores on Adroit. The vertical bars denote the empirical standard deviation over 20 seeds.

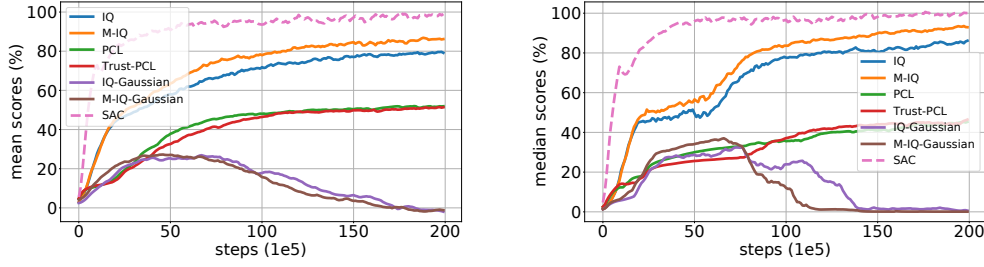

Figure 10: SAC-normalized ablation scores on Gym. *Unique parameters*: all algorithms use a single set of hyperparameters for the 5 environments.

635 **Ablations.** We report ablation scores, averaged over 20 seeds, comparing IQ, M-IQ, PCL, Trust-  
636 PCL and (M)-IQ-Gaussian in Fig. 10. PCL (and Trust-PCL) are obtained by replacing  $V_{\tilde{\phi}}$  by  $V_{\phi}$  in  
637  $\mathcal{L}_{IQ}$ . (M)-IQ Gaussian is obtained by parametrizing the policy as a diagonal normal distribution over  
638 the action. Results confirm that the fixed-point approach is beneficial wrt the residual one in this case,  
639 since IQ outperforms PCL and trust-PCL by a clear margin in median and mean<sup>4</sup>. They also validate  
640 that the Gaussian parametrization is too limiting in IQ, since IQ-Gaussian and M-IQ-Gaussian both  
641 totally collapse after 6 to 7 millions environment steps. Additionally, this also highlights that the  
642 time frame usually considered on some of this environments (3M, or even 1M steps) may be too  
643 short to actually observe the asymptotic behavior of many agents. Here, this time frame would have  
644 prevented us to observe this collapsing phenomenon on the Gaussian IQ.

645 **Influence of the parameters.** As an addition to the study of the temperature in Fig. 4, we provide  
646 results for 3 values of  $\tau$  and 2 values of  $\alpha$ . We report scores for IQ with  $\alpha = 0$  with different values  
647 of  $\tau$  in Fig. 11 and the same experiments on M-IQ (with  $\alpha = 0.9$ ) in Fig. 12. Clearly,  $\tau$  has a much  
648 stringer influence on IQ than  $\alpha$ . This is a key empirical difference regarding the performance of  
649 M-DQN [Vieillard et al., 2020b], that has the same parameters, but is evaluated on discrete actions  
650 settings. In these settings, the  $\alpha$  parameters is shown to have a crucial importance in terms of  
651 empirical results: M-DQN with  $\alpha = 0.9$  largely outperforms M-DQN with  $\alpha = 0$  on the Atari  
652 benchmark. While this term still has effect in IQ on some tasks, it is empirically less useful, even  
653 though it is never detrimental; this discrepancy is yet to be understood.

<sup>4</sup>We note that PCL was introduced only for discrete actions, and that Trust-PCL was proposed with a Gaussian policy, on a much shorter time frame for training, and with many additional tricks.

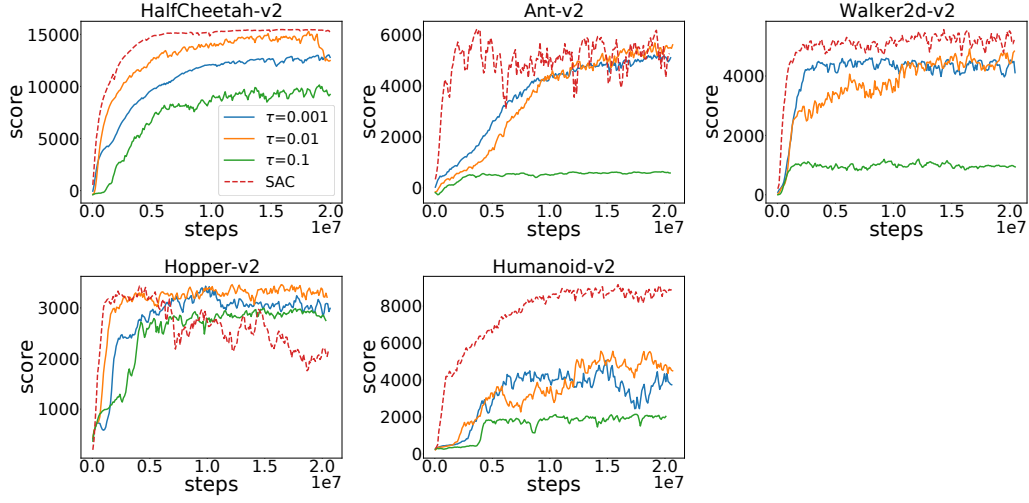

Figure 11: IQ ( $\alpha = 0$ ) with several values for  $\tau$  on all Gym tasks. Each line is the average over 3 seeds.

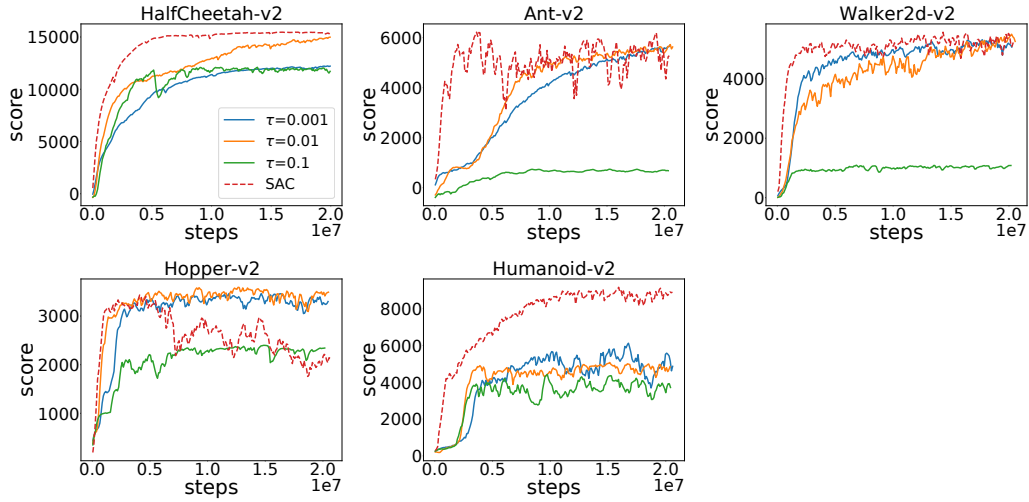

Figure 12: M-IQ ( $\alpha = 0.9$ ) with several values for  $\tau$  on all Gym tasks. Each line is the average over 3 seeds.
